# Supplementary material for: Ophirina amphinema n. gen., n. sp., a New Deeply Branching Discobid with Phylogenetic Affinity to Jakobids
Source: PubMed Central journal article supplement (PMC6212452; doi:10.1038/s41598-018-34504-6), 2018-11-01
Supplement: 41598_2018_34504_MOESM1_ESM.pdf [file 41598_2018_34504_MOESM1_ESM.pdf]

***Ophirina amphinema* n. gen., n. sp., a New Deeply Branching Discobid with  
Phylogenetic Affinity to Jakobids**

Akinori Yabuki<sup>1†</sup>, Yangtsho Gyaltshen<sup>2</sup>, Aaron A. Heiss<sup>2</sup>, Katsunori Fujikura<sup>1</sup>, Eunsoo Kim<sup>2†</sup>

<sup>1</sup> Department of Marine Biodiversity Research, Japan Agency for Marine-Earth Science and Technology (JAMSTEC)

<sup>2</sup> Division of Invertebrate Zoology and Sackler Institute for Comparative Genomics, American Museum of Natural History

†Corresponding authors:

Akinori Yabuki, Department of Marine Biodiversity Research, Japan Agency for Marine-Earth Science and Technology (JAMSTEC)---Telephone number: +81 46867 9498; FAX number: +81 46867-9525; e-mail: yabukia@jamstec.go.jp

Eunsoo Kim, Division of Invertebrate Zoology and Sackler Institute for Comparative Genomics, American Museum of Natural History ---Telephone number: +1 212 769 5510; FAX number: +1 212 769 5277; e-mail: ekim1@amnh.org

Running title: ***Ophirina*, the sister taxon to jakobids**

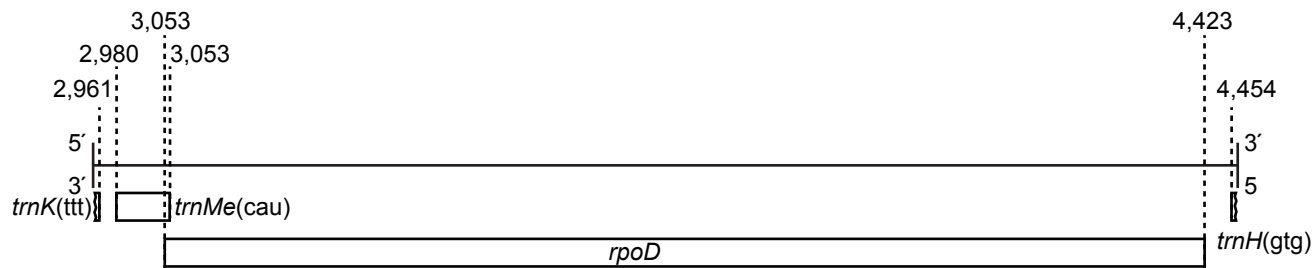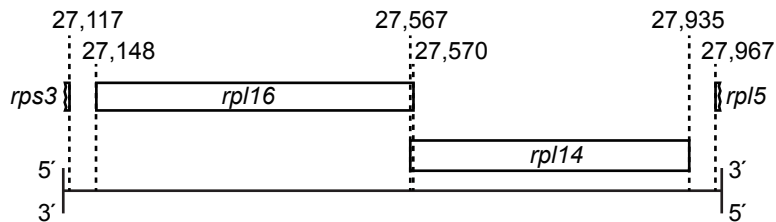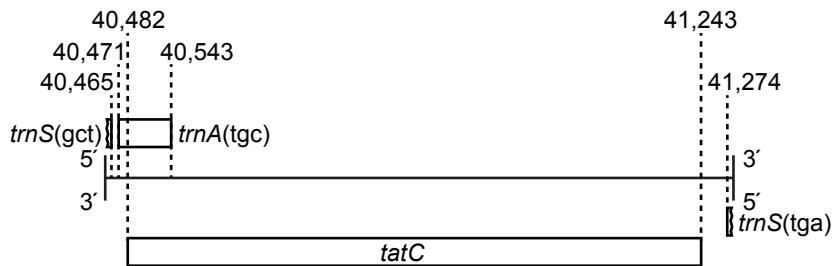

Fig. S1

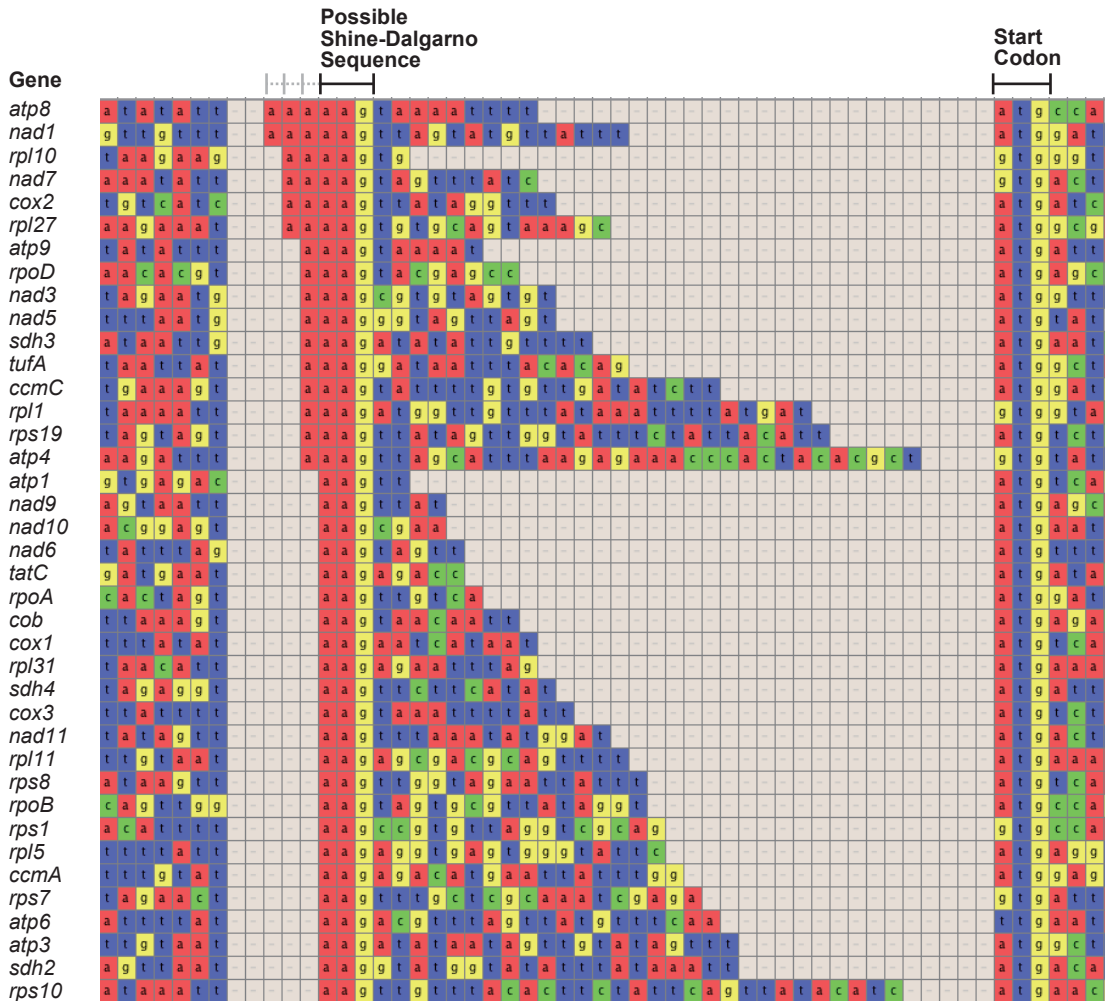

Fig. S2

**Figure S1.** Partial map of the mitochondrial genome in which two genes overlapped.

**Figure S2.** Possible Shine–Dalgarno translation initiation motifs (5'-AAG-3').

**Supplementary video 1.** Two *Ophirina amphinema* cells of suspension type. Note characteristic beating motion of posterior flagellum along feeding groove.

**Supplementary video 2.** Swimming type cell of *Ophirina amphinema*, showing jittery movement.
